# Regulation of Petrobactin and Bacillibactin Biosynthesis in *Bacillus anthracis* under Iron and Oxygen Variation

Jung Yeop Lee<sup>1\*<sup>‡a</sup></sup>, Karla D. Passalacqua<sup>2<sup>‡b</sup></sup>, Philip C. Hanna<sup>2</sup>, David H. Sherman<sup>1\*</sup>

**1** Life Sciences Institute and Departments of Medicinal Chemistry, Chemistry, Microbiology and Immunology, University of Michigan, Ann Arbor, Michigan, United States of America, **2** Department of Microbiology and Immunology, University of Michigan Medical School, Ann Arbor, Michigan, United States of America

## Abstract

**Background:** *Bacillus anthracis* produces two catechol siderophores, petrobactin and bacillibactin, under iron-limited conditions. Here, we investigate how variable iron and oxygen concentrations influence the biosynthetic output of both siderophores in *B. anthracis*. In addition, we describe the differential levels of transcription of select genes within the *B. anthracis* siderophore biosynthetic operons that are responsible for synthesis of petrobactin and bacillibactin, during variable growth conditions.

**Methodology/Principal Findings:** Accumulation of bacillibactin in *B. anthracis* Sterne (34F<sub>2</sub>) and in a mutant lacking the major superoxide dismutase (*ΔsodA1*) was almost completely repressed by the addition of 20 μM of iron. In contrast, petrobactin synthesis in both strains continued up to 20 μM of iron. Accumulation of petrobactin and bacillibactin showed a slight increase with addition of low levels of paraquat-induced oxidative stress in wild type *B. anthracis* Sterne. Cultures grown with high aeration resulted in greater accumulation of petrobactin relative to low aeration cultures, and delayed the repressive effect of added iron. Conversely, iron-depleted cultures grown with low aeration resulted in increased levels of bacillibactin. No difference was found in overall superoxide dismutase (SOD) activity or transcriptional levels of the *sodA1* and *sodA2* genes between iron-depleted and iron-replete conditions at high or low aeration, suggesting that SOD regulation and iron metabolism are separate in *B. anthracis*. The highest transcription of the gene *asbB*, part of the petrobactin biosynthetic operon, occurred under iron-limitation with high aeration, but transcription was readily detectable even under iron-replete conditions and in low aeration. The gene *dhbC*, a member of the bacillibactin biosynthetic operon, was only transcribed under conditions of iron-depletion, regardless of growth aeration.

**Conclusion:** These data suggest that bacillibactin regulation is highly sensitive to iron-concentration. In contrast, although regulation of petrobactin is less dependent on iron, it is likely subject to additional levels of regulation that may contribute to virulence of *B. anthracis*.

**Citation:** Lee JY, Passalacqua KD, Hanna PC, Sherman DH (2011) Regulation of Petrobactin and Bacillibactin Biosynthesis in *Bacillus anthracis* under Iron and Oxygen Variation. PLoS ONE 6(6): e20777. doi:10.1371/journal.pone.0020777

**Editor:** Sarah K. Highlander, Baylor College of Medicine, United States of America

**Received:** January 11, 2011; **Accepted:** May 10, 2011; **Published:** June 6, 2011

**Copyright:** © 2011 Lee et al. This is an open-access article distributed under the terms of the Creative Commons Attribution License, which permits unrestricted use, distribution, and reproduction in any medium, provided the original author and source are credited.

**Funding:** This research was supported by the Great Lakes Regional Center of Excellence for Bio-defense and Emerging Infectious Diseases Research (Grant U54AI57153), and the Hans W. Vahlteich Professorship (D.H.S.). K.D.P. was supported by the University of Michigan F.G. Novy Fellowship, and HHS contract N266200400059C-N01-AI-40059. The funders had no role in study design, data collection and analysis, decision to publish, or preparation of the manuscript.

**Competing Interests:** The authors have declared that no competing interests exist.

\* E-mail: davidhs@umich.edu (DHS); jylee309@gmail.com (JYL)

‡ These authors contributed equally to this work.

‡a Current address: Evolva, Inc., Palo Alto, California, United States of America

‡b Current address: Emory University School of Medicine, Atlanta, Georgia, United States of America

## Introduction

Iron acquisition is a crucial process for most organisms since this element is an essential component of enzymes of primary metabolism [1]. Most living organisms require iron as a cofactor for enzymes that are involved in redox reactions and other essential functions and possess efficient systems for the uptake, transport and storage of this element [1,2]. For bacteria, acquisition of iron is facilitated by high affinity metal chelators called siderophores that are actively taken up by iron-depleted cells through specific membrane receptors [1,2,3,4]. Although iron has an essential role in cell metabolism, free iron can be deleterious to cells by forming oxygen radicals after reaction with hydrogen peroxide. Consequently, iron acquisition and storage in microor-

ganisms must be efficiently regulated to avoid both starvation and toxicity.

Iron and oxygen are essential for aerobic life, but oxygen-derived species such as superoxide and hydrogen peroxide that occur as by-products of aerobic metabolism, are potentially toxic [5]. To face this threat, all organisms have defense mechanisms against oxygen derivatives and also tightly regulate the intracellular iron concentration [2,4,6]. Evidence has started to emerge for coordination between the expression of antioxidant enzymes and iron metabolism (transport, sequestration). The regulation of superoxide dismutase (SOD) in *E. coli* illustrates this coordination. SOD is a ubiquitous enzyme that scavenges intracellular superoxide radicals, playing a major role in the defense system against oxidative stress [7,8]. Thus, either increased generation of

superoxide or an increase in steady state levels of superoxide can create oxidative stress.

*B. anthracis* is a zoonotic soil microorganism and the causative agent of anthrax. This bacterium is a highly virulent mammalian pathogen and among the known biological-warfare agents. *B. anthracis* is widely accepted as one of the most serious threats because of the resilience of its spores and potential use as a bioweapon [9,10]. *B. anthracis* produces two catecholate siderophores, petrobactin and bacillibactin (Figure 1), under iron-limited conditions [11] and the biosynthesis of these molecules is associated with two operons, *asb* (for petrobactin) and *bac* (for bacillibactin). It has been demonstrated that only the *asb* locus is required for growth in iron-depleted media and for virulence in a mouse model [11].

In previous work [12], we described the first details on the biosynthesis of petrobactin by identification of its biosynthetic intermediates isolated from various *B. anthracis asb* mutants. In addition, we provided the basis for assigning the order of assembly and presumed role for gene products encoded by the *asb* operon [13]. Previous studies also revealed the four putative *sods* encoded on the *B. anthracis* genome, and *sodAI* is the main paralog responsible for protection from endogenous superoxide stress [14]. Additionally, wild type *B. anthracis* Sterne and the *AsodAI* mutant displayed a major increase in the transcription of genes involved in bacillibactin biosynthesis and iron/metal transport after treatment with paraquat (800  $\mu$ M) [15]. However, actual levels of both bacillibactin and petrobactin were decreased after treatment with 800  $\mu$ M paraquat [15]. Therefore, we sought to further characterize the relationship between siderophore production and milder forms of oxidative stress in both wild type and *AsodAI* mutant of *B. anthracis*.

In this study, experiments were conducted to investigate how variable iron concentrations, low levels of the redox cycling compound paraquat, and differing levels of atmospheric oxygen could influence the biosynthetic output of both the *B. anthracis* siderophores petrobactin and bacillibactin. In addition, we describe the differential levels of transcription of select genes within the *B. anthracis* siderophore biosynthetic operons that are responsible for assembly of petrobactin and bacillibactin, during variable growth conditions. The *B. anthracis AsodAI* mutant, which is attenuated for growth in metal-chelated medium, was used in addition to wild type Sterne to determine if siderophore-mediated iron metabolism and SOD activity are linked in this pathogenic microorganism.

## Results and Discussion

### Iron Concentration Represses Accumulation of *B. anthracis* Siderophores Petrobactin and Bacillibactin

In general, the biosynthesis of siderophores is negatively regulated by iron [1] and this has been demonstrated in many microorganisms [16,17,18]. In iron-limited cultures of *Azotobacter vinelandii*, the siderophore azotobactin was present in a 1  $\mu$ M iron-fed medium and was completely repressed at 3  $\mu$ M iron [17]. In the fungus *Ustilago maydis*, when iron was limiting in the growth medium, it produced copious amounts of the cyclic peptide siderophores ferrichrome and ferrichrome A [16]. However, accumulation of siderophores was almost completely eliminated within 6 hours after the addition of iron to cultures of the fungus. Addition of 7  $\mu$ M iron to the iron-limiting cultures of *Fusarium venenatum* A3/5 almost completely repressed siderophore production [18]. Therefore, we sought to investigate how overall accumulation of both siderophores petrobactin and bacillibactin in *B. anthracis* changes by the addition of iron to iron-limited cultures.

We compared accumulation of petrobactin and bacillibactin in iron-depleted medium (IDM) cultures of *B. anthracis* wild type Sterne (34F<sub>2</sub>), the mutant *AsodAI*, and *AsbABCDE* and *AdhbACEBF* (as negative controls for the production of petrobactin and bacillibactin, respectively) that were grown for 24 hours under iron-depleted (no addition of Fe) and iron-replete (addition of 3, 6, 10 and 20  $\mu$ M Fe) conditions. Quantities of petrobactin and bacillibactin from *B. anthracis* were monitored using LCMS after isolating from supernatants of 24 hour cultures of each strain in IDM with the indicated levels of iron-supplementation (Table 1). The LCMS analysis revealed that in iron-depleted conditions, higher levels of petrobactin and bacillibactin accumulated in wild type Sterne than in the mutant *AsodAI* (almost 2-fold and 4-fold amounts of petrobactin and bacillibactin, respectively) (Table 1). Overall, when iron was added to the iron-depleted cultures, the amount of petrobactin accumulated was more in *AsodAI* than Sterne. However, there was no significant difference in the amount of bacillibactin accumulated between Sterne and *AsodAI* after iron addition, where bacillibactin is barely detectable when even 3  $\mu$ M iron was present. As anticipated, neither petrobactin in *AsbABCDE* nor bacillibactin in *AdhbACEBF* was detected under any conditions (data not shown).

The general pattern in *B. anthracis* showed that as the iron concentration increased, the accumulation of both siderophores decreased (Table 1 and Figure 2). The abolished production of

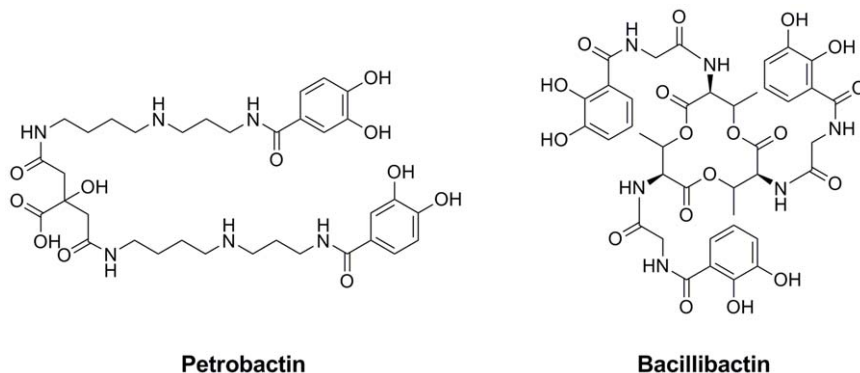

**Figure 1. Chemical structures of *B. anthracis* siderophores petrobactin and bacillibactin.**  
doi:10.1371/journal.pone.0020777.g001

**Table 1.** Quantification of the petrobactin and bacillibactin siderophores produced by *Bacillus anthracis* Sterne 34F<sub>2</sub> and the mutant  $\Delta sodA1$  under IDM cultures with the addition of different concentrations of iron.

| Iron ( $\mu$ M) | Petrobactin ( $\mu$ g/ml) <sup>a</sup> |                    | Bacillibactin ( $\mu$ g/ml) <sup>a</sup> |                   |
|-----------------|----------------------------------------|--------------------|------------------------------------------|-------------------|
|                 | Sterne 34F <sub>2</sub>                | $\Delta sodA1$     | Sterne 34F <sub>2</sub>                  | $\Delta sodA1$    |
| 0               | 132.430 $\pm$ 11.035                   | 66.609 $\pm$ 9.341 | 1.362 $\pm$ 0.023                        | 0.283 $\pm$ 0.005 |
| 3               | 24.046 $\pm$ 5.678                     | 65.789 $\pm$ 7.451 | 0.004 $\pm$ 0.000                        | 0.003 $\pm$ 0.001 |
| 6               | 20.486 $\pm$ 5.101                     | 39.905 $\pm$ 6.450 | 0.003 $\pm$ 0.000                        | 0.003 $\pm$ 0.000 |
| 10              | 18.888 $\pm$ 4.789                     | 25.623 $\pm$ 4.346 | 0.002 $\pm$ 0.000                        | 0.003 $\pm$ 0.000 |
| 20              | 17.035 $\pm$ 4.456                     | 25.209 $\pm$ 4.509 | 0.001 $\pm$ 0.000                        | 0.001 $\pm$ 0.000 |

<sup>a</sup>Concentration of siderophores petrobactin and bacillibactin is expressed as  $\mu$ g/ml of supernatant from IDM cultures of *B. anthracis*.

<sup>b</sup>Quantification was performed three times from the independent extraction and values represent means  $\pm$  standard deviations.

doi:10.1371/journal.pone.0020777.t001

bacillibactin in Sterne and  $\Delta sodA1$  in medium with 3  $\mu$ M iron and the barely detectable levels of this siderophore in 20  $\mu$ M iron is comparable to what has been observed in *A. vinelandii* [17], and the fungi *Rhodotorula mucilaginosa* [19] and *Rhizopus microsporus* [20], where the production of azotobactin and fungal siderophores were repressed under similar conditions. However, petrobactin synthesis in both Sterne and  $\Delta sodA1$  occurred up to 20  $\mu$ M of iron. Taken together, these data suggest that there might be additional factors involved in the regulation of petrobactin synthesis in *B. anthracis* in addition to the ferric uptake repressor (Fur), and that regulation of the biosynthesis of this particular metabolite is not entirely controlled by iron concentration.

### Low Levels of Paraquat Induce Slight Increases in Accumulation of Petrobactin and Bacillibactin

Paraquat is an oxygen radical generator and it is known to induce catalase and superoxide dismutase activities, presumably as oxidative stress protection mechanisms in the microbial cells [21,22]. Previously, we showed that high levels of paraquat stress (100  $\mu$ M and 800  $\mu$ M) increases the transcription of genes involved in bacillibactin biosynthesis, but that these levels of paraquat decrease end-point bacillibactin and petrobactin accumulation [15]. We therefore, reasoned that major intracellular redox stress at these levels may interfere with the redox sensitive enzymatic steps of siderophore biosynthesis, and that lower, more biological levels of oxidative stress may increase siderophore production.

To investigate this, wild type Sterne and the mutant  $\Delta sodA1$  were exposed to several mild concentrations of paraquat (0, 5, 15, 25 and 50  $\mu$ M) in IDM. Note that in wild type cells, 800  $\mu$ M paraquat is non-toxic, and thus the low paraquat concentrations used here are presumably promoting very low-levels of endogenous superoxide stress. Quantities of petrobactin and bacillibactin from the paraquat-exposed *B. anthracis* were analyzed using LCMS by isolating 24 hour supernatant cultures of the strains in IDM (Table 2). It should be noted that when spores of *B. anthracis* strains Sterne and  $\Delta sodA1$  were used to inoculate IDM cultures with paraquat already added, no growth was observed, even under the lowest concentration of paraquat (5  $\mu$ M; data not shown), which indicates that paraquat is very toxic to spore germination when iron is limiting. Therefore, cultures were grown to saturation and

these vegetative cultures were back-diluted into fresh IDM medium with the indicated amount of paraquat present.

LCMS analysis showed that under iron-limited conditions, accumulation of petrobactin and bacillibactin were slightly increased by addition of paraquat in *B. anthracis* wild type Sterne (Table 2 and Figure 3). This strain responded to paraquat treatment by a gradual increase in accumulations of petrobactin and bacillibactin at each concentration and showed 1.2-fold and 11.9-fold increase in petrobactin and bacillibactin, respectively, at higher concentration of 50  $\mu$ M paraquat. However, for the *B. anthracis*  $\Delta sodA1$  mutant, a significant decrease in accumulation of petrobactin and bacillibactin was observed dependent upon the treatment with paraquat, indicating a higher sensitivity of iron-starved cells of  $\Delta sodA1$  toward paraquat treatment. It is notable that accumulation of bacillibactin was almost completely repressed by the addition of paraquat in  $\Delta sodA1$  (700-fold-lower level compared to bacillibactin content in wild type Sterne at 5  $\mu$ M paraquat) and no bacillibactin was detected at the concentration of more than 15  $\mu$ M paraquat, due mainly to the strong deleterious effect of paraquat on growth of this mutant in iron-depleted conditions, underscoring the importance of *sodA1* to *B. anthracis* for protection from endogenous superoxide stress, particularly when iron is limiting. Interestingly, despite the severe growth defect experienced by  $\Delta sodA1$  in IDM with paraquat, petrobactin were still detected in these cultures. However, unlike Sterne, petrobactin levels decrease as paraquat increases, suggesting that in addition to slowed growth, the biosynthetic enzymes for petrobactin may be highly sensitive to redox conditions, and that *sodA1* is needed to maintain suitable intracellular redox conditions.

Previous studies have shown that paraquat decreased accumulation of the siderophore pyoverdine in iron-limited cultures of *Pseudomonas aeruginosa* [23]. In contrast, Eisendle and co-workers [24] have demonstrated that in the fungus *Aspergillus nidulans*, during iron starvation, accumulation of the siderophore ferricrocin was upregulated by the addition of oxidative stress agent paraquat. Tindale et al. [17] reported up-regulation of *csbC*, an early gene required for the catecholate siderophore biosynthesis, which encodes an isochorismate synthase in *A. vinelandii* by the addition of paraquat. Similarly, our data show that oxidative stress causes slightly increased, or at least steady state levels of accumulation of both petrobactin and bacillibactin for *B. anthracis* wild type Sterne during iron-depleted conditions.

### Iron-Related Repression of Petrobactin Is Delayed by High Aeration and Bacillibactin Biosynthesis Is Promoted during Low Aeration

Previously, Cendrowski et al. [11] identified two operons encoding the enzymes responsible for biosynthesis of the two *B. anthracis* siderophores, named *asb* and *bac*, which are responsible for the biosynthesis of petrobactin and bacillibactin, respectively. To investigate a possible effect of oxygen tension on the regulation of the *asb* and *bac* operons that may result in changes in accumulation of petrobactin and bacillibactin under iron-limited conditions, cultures were grown for 24 hours in IDM with variable concentrations of iron, and aeration altered by varying culture volume per flask. Quantities of petrobactin and bacillibactin were monitored using LCMS as described in Materials and Methods.

The addition of iron to the IDM cultures of *B. anthracis* caused the repression of accumulation of petrobactin with both high and low aeration (Table 3 and Figure 4A). As described earlier in this study (Table 1), petrobactin accumulation in both strains continued up to a concentration of 20  $\mu$ M iron regardless of high or low aeration. However, higher accumulation of petrobactin was observed in both Sterne and the mutant  $\Delta sodA1$  in the high

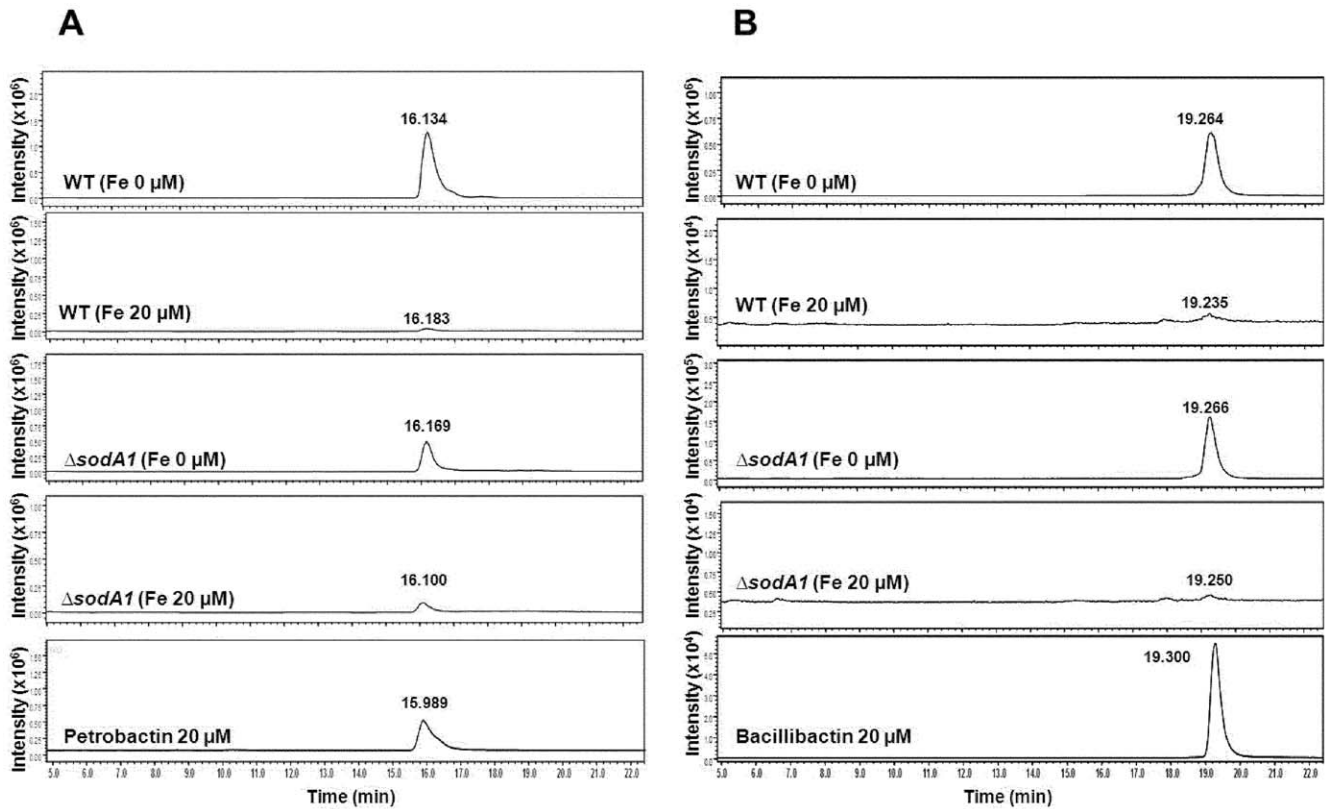

**Figure 2. LCMS traces of extracts from the IDM cultures of *B. anthracis* showing the presence of petrobactin and bacillibactin with or without addition of iron.** (A) Selected ion monitoring (SIM) chromatogram of petrobactin at the mass range of  $m/z$  719.3  $[M+H]^+$ . The peaks at 15.989–16.183 min represent petrobactin. (B) SIM chromatogram of bacillibactin at the mass range of  $m/z$  883.2  $[M+H]^+$ . The peaks at 19.235–19.300 min represent bacillibactin.

doi:10.1371/journal.pone.0020777.g002

**Table 2. Quantification of the *Bacillus anthracis* siderophores petrobactin and bacillibactin obtained from the IDM cultures of the strains Sterne 34F<sub>2</sub> and  $\Delta$ sodA1 with the addition of different concentrations of paraquat.**

| Paraquat ( $\mu$ M) | Petrobactin ( $\mu$ g/ml) <sup>a</sup> |                    | Bacillibactin ( $\mu$ g/ml) <sup>a</sup> |                   |
|---------------------|----------------------------------------|--------------------|------------------------------------------|-------------------|
|                     | Sterne 34F <sub>2</sub>                | $\Delta$ sodA1     | Sterne 34F <sub>2</sub>                  | $\Delta$ sodA1    |
| 0                   | 103.432 $\pm$ 9.300 <sup>b</sup>       | 61.883 $\pm$ 5.430 | 0.179 $\pm$ 0.038                        | 0.632 $\pm$ 0.135 |
| 5                   | 104.731 $\pm$ 13.456                   | 34.537 $\pm$ 5.010 | 0.823 $\pm$ 0.101                        | 0.001 $\pm$ 0.000 |
| 15                  | 108.623 $\pm$ 7.891                    | 22.785 $\pm$ 3.214 | 1.434 $\pm$ 0.231                        | NO <sup>c</sup>   |
| 25                  | 120.907 $\pm$ 11.235                   | 20.966 $\pm$ 3.010 | 1.935 $\pm$ 0.201                        | NO                |
| 50                  | 125.701 $\pm$ 14.500                   | 12.358 $\pm$ 2.340 | 2.026 $\pm$ 0.130                        | NO                |

<sup>a</sup>Concentration of siderophores petrobactin and bacillibactin is expressed as  $\mu$ g/ml of supernatant from IDM cultures of *B. anthracis*.

<sup>b</sup>Quantification was performed three times from the independent extraction and values represent means  $\pm$  standard deviations.

<sup>c</sup>NO, not observed.

\*Paraquat (PQ) concentration and incubation times before cell lysate and supernatant harvesting for siderophore quantification are as follows: For exponentially growing cells, 800  $\mu$ M paraquat was added at OD<sub>600</sub> 0.4–0.5 and cells were harvested after 1 hour.

\*\*Note that of all the samples, the growth of  $\Delta$ sodA1 is slowed by the addition of paraquat, and so the final OD<sub>600</sub> of this sample was slightly lower than that of all others.

doi:10.1371/journal.pone.0020777.t002

aeration cultures relative to the low aeration samples (Table 3) at all iron-concentrations, indicating that increased aeration promotes the biosynthesis of petrobactin and delays the repressive effect of added iron.

The accumulation of bacillibactin was severely repressed by addition of iron to IDM cultures of both Sterne and  $\Delta$ sodA1 with high and low aeration (Table 4 and Figure 4B). Surprisingly, counter to the case for petrobactin, the highest levels of bacillibactin in Sterne and  $\Delta$ sodA1 were found in IDM (no iron supplementation) under low aeration. Koppisch et al. [25] reported that relatively low levels of bacillibactin accumulated in iron-depleted cultures of *B. anthracis*, but they conversely observed that cultures grown in ambient air seemed to produce higher levels of bacillibactin. However, we found that IDM cultures grown in a 40% culture-to-flask volume ratio resulted in the highest levels of bacillibactin we have seen thus far (average  $\sim$  16  $\mu$ g/ml in low aeration versus 2  $\mu$ g/ml in high aeration for Sterne, the latter representing an 80% decrease, and the measurement being near our detection limits). Hence, whereas high aeration with iron-depletion promotes the accumulation of petrobactin, the opposite condition of low aeration with iron-depletion promotes the accumulation of bacillibactin. These data support the idea that petrobactin and bacillibactin production are not subject to the same levels of regulation, and suggest that metal acquisition systems have evolved differently in *B. anthracis* compared to its relative *B. subtilis* [26], where *B. subtilis* relies primarily on bacillibactin for iron scavenging. Although *B. subtilis* is a model organism for the study of Gram-positive bacteria, *B. anthracis* has

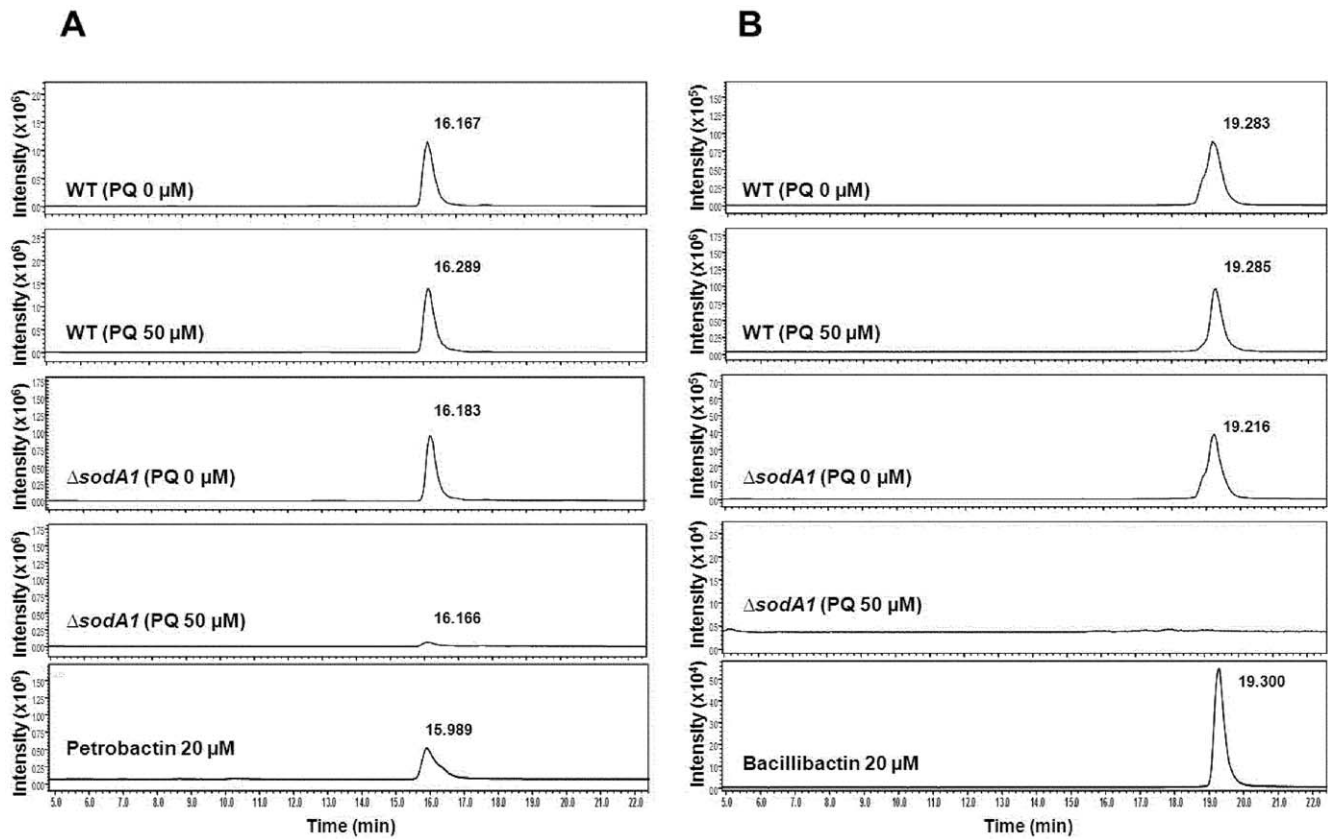

**Figure 3. LCMS chromatogram of petrobactin and bacillibactin in the extracts obtained from the IDM cultures of *B. anthracis* with or without addition of paraquat.** (A) SIM chromatogram of petrobactin at the mass range of  $m/z$  719.3  $[M+H]^+$ . The peaks at 15.989–16.289 min represent petrobactin. (B) SIM chromatogram of bacillibactin at the mass range of  $m/z$  883.2  $[M+H]^+$ . The peaks at 19.216–19.300 min represent bacillibactin.

doi:10.1371/journal.pone.0020777.g003

evolved a pathogenic lifestyle, exploiting non-soil growth environments, and revealing variety in the evolution of metal-acquisition regulation.

### Superoxide Dismutase (SOD) Activity from Whole Cell Lysates of *B. anthracis* Grown in IDM with Varying Aeration

Previous work has shown that overall SOD enzymatic activity in the microorganism *Azotobacter vinelandii* increases with increasing iron concentration [17]. Additionally, in *E. coli*, a connection between iron, oxygen and SOD regulation has been investigated [27,28,29]. Therefore, we sought to explore whether overall SOD enzymatic activity in *B. anthracis* changes between iron depleted and iron-replete conditions as it does in *A. vinelandii* [17], because iron-regulated gene expression has been observed to change during oxidative stress in *B. anthracis* [15]. It has been shown that two of the four putative SODs (SODA1 and SODA2) of *B. anthracis* can be isolated in active form, but that only *sodA1* is necessary for resistance to endogenous superoxide stress [14]. Figure 5A shows the results of a Nitroblue Tetrazolium Salt assay of superoxide dismutase activity (NBT-SOD assay) from whole cell lysates of wild type Sterne and the mutants *ΔsodA1* and *ΔsodA2* grown in LB medium, with and without the addition of the redox cycling reagent paraquat (800 μM). The overall SOD activity in Sterne did not change significantly after paraquat induced oxidative stress. The *ΔsodA1* mutant under both conditions revealed a severe reduction of SOD activity, whereas the *ΔsodA2*

mutant showed almost identical overall SOD activity as wild type Sterne in these growth conditions. These results demonstrate that SODA1 is the primary superoxide dismutase in *B. anthracis*.

Figure 5B shows the results of Sterne cells grown in iron-depleted conditions [30] with and without iron supplementation and under high and low aeration. Overall, there are no significant differences in the levels of SOD activity with or without added iron, or at high or low aeration. Non-denaturing PAGE assays of SOD activity from these lysates revealed that SODA1 is the paralog predominantly present under iron-limitation with both high and low aeration (not shown). These data suggest that unlike *A. vinelandii* [17], there is no difference in overall superoxide scavenging ability of *B. anthracis* between iron-depleted and iron-replete conditions at high or low aeration. Other metal and oxidative conditions that may affect overall SOD activity in this organism are currently under investigation.

### SYBR-Green Quantitative RT-PCR of Select Genes from the *Asb* and *Bac* Operons in Iron-Depleted and Iron-Replete Conditions with Varying Aeration

Previously, it was shown that a *B. anthracis* mutant lacking the biosynthetic operon for petrobactin synthesis (*asb* operon) is attenuated for growth in iron-depleted medium, but is capable of eventual entry into stationary phase at the same level as wild type [12]. Because this mutant has an intact *bac* operon, it is possible that the bacillibactin siderophore is able to support growth in iron-poor conditions in place of petrobactin. Because *B. anthracis*

**Table 3.** Quantification of petrobactin from IDM cultures of *Bacillus anthracis* Sterne 34F<sub>2</sub> and  $\Delta$ sodA1 with the addition of different concentrations of iron under high (high O<sub>2</sub>) and low aeration (low O<sub>2</sub>).

| Iron ( $\mu$ M) | Petrobactin ( $\mu$ g/ml) <sup>a</sup> under high O <sub>2</sub> |                      | Petrobactin ( $\mu$ g/ml) under low O <sub>2</sub> |                    |
|-----------------|------------------------------------------------------------------|----------------------|----------------------------------------------------|--------------------|
|                 | Sterne 34F <sub>2</sub>                                          | $\Delta$ sodA1       | Sterne 34F <sub>2</sub>                            | $\Delta$ sodA1     |
| 0               | 193.764 $\pm$ 13.012 <sup>b</sup>                                | 135.838 $\pm$ 9.089  | 55.669 $\pm$ 4.502                                 | 40.973 $\pm$ 3.450 |
| 3               | 96.988 $\pm$ 9.345                                               | 100.247 $\pm$ 10.341 | 23.188 $\pm$ 4.568                                 | 24.646 $\pm$ 2.310 |
| 6               | 84.372 $\pm$ 10.101                                              | 86.371 $\pm$ 5.680   | 21.418 $\pm$ 3.213                                 | 23.882 $\pm$ 4.101 |
| 10              | 80.333 $\pm$ 5.670                                               | 65.322 $\pm$ 4.510   | 19.610 $\pm$ 3.217                                 | 22.869 $\pm$ 1.120 |
| 20              | 51.402 $\pm$ 3.401                                               | 43.005 $\pm$ 5.101   | 19.495 $\pm$ 1.101                                 | 17.863 $\pm$ 2.310 |

<sup>a</sup>Concentration of petrobactin is expressed as  $\mu$ g/ml of supernatant from IDM cultures of *B. anthracis*.

<sup>b</sup>Quantification was performed three times from the independent extraction and values represent means  $\pm$  standard deviations.

doi:10.1371/journal.pone.0020777.t003

produces two unique siderophores, one of which (petrobactin) appears to play a more predominant role in overall growth and physiology, we decided to assess transcriptional levels of select

genes from the *asb* and *bac* loci in iron-rich and iron-poor growth conditions. Figure 6 shows the results of SYBR-Green quantitative RT-PCR (qRT-PCR, numeric data) and end-point RT-PCR (gels)

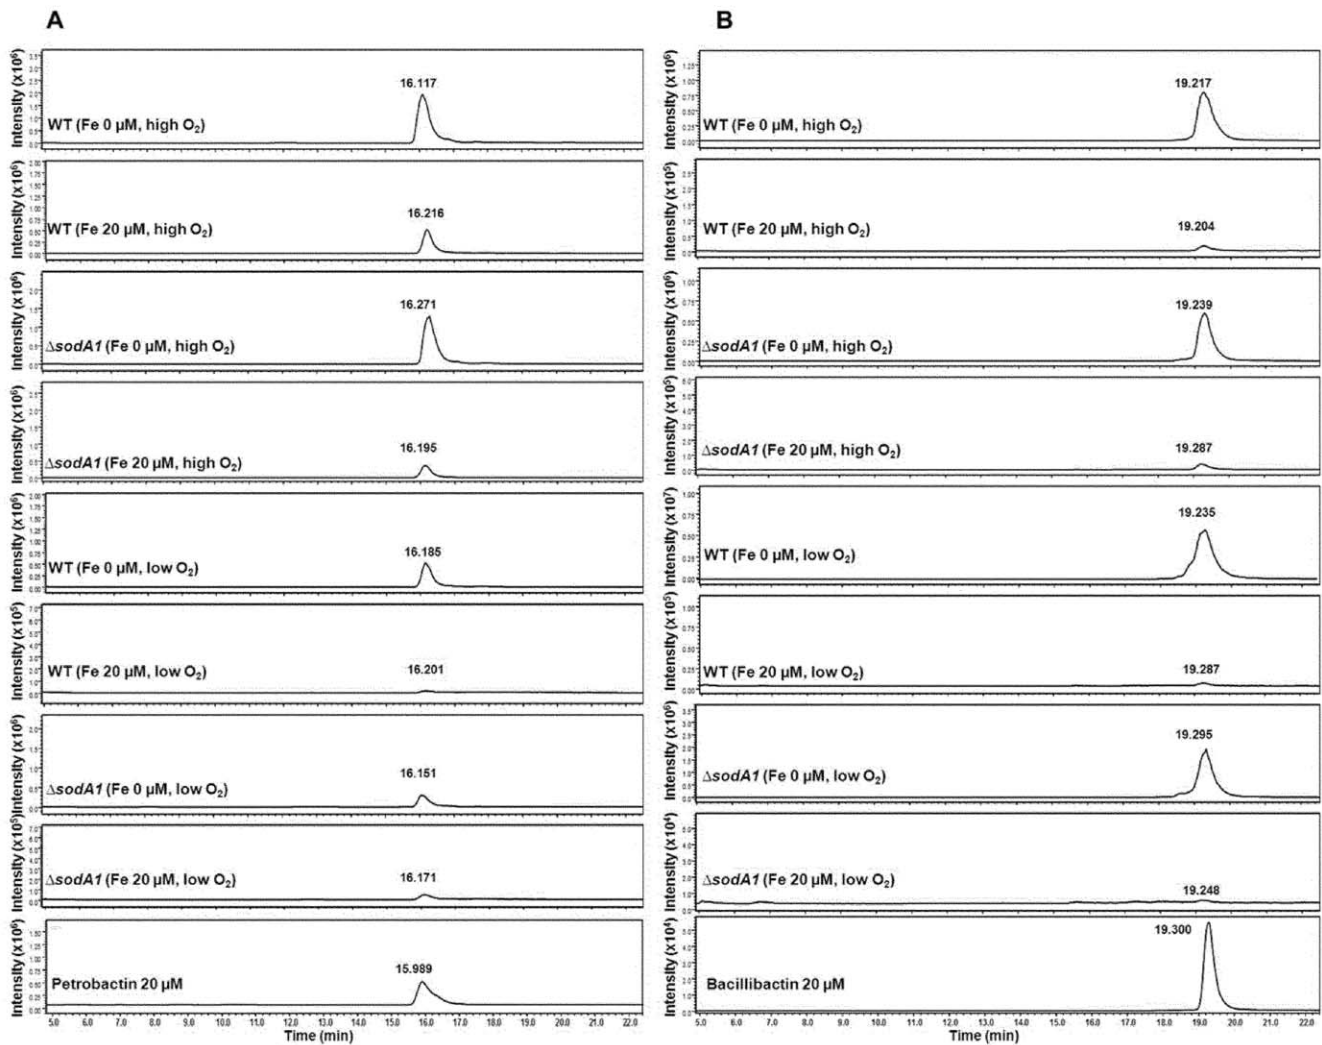

**Figure 4.** LCMS profiles of petrobactin and bacillibactin from the extracts of the IDM cultures of *B. anthracis* with or without addition of iron under high and low aeration. (A) SIM chromatogram of petrobactin at the mass range of  $m/z$  719.3 [M+H]<sup>+</sup>. The peaks at 15.989–16.271 min represent petrobactin. (B) SIM chromatogram of bacillibactin at the mass range of  $m/z$  883.2 [M+H]<sup>+</sup>. The peaks at 19.204–19.300 min represent bacillibactin.

doi:10.1371/journal.pone.0020777.g004

**Table 4.** Quantification of bacillibactin from IDM cultures of *Bacillus anthracis* Sterne 34F<sub>2</sub> and  $\Delta$ sodA1 with the addition of different concentrations of iron under high (high O<sub>2</sub>) and low aeration (low O<sub>2</sub>).

| Iron ( $\mu$ M) | Bacillibactin ( $\mu$ g/ml) <sup>a</sup> under high O <sub>2</sub> |                   | Bacillibactin ( $\mu$ g/ml) under low O <sub>2</sub> |                   |
|-----------------|--------------------------------------------------------------------|-------------------|------------------------------------------------------|-------------------|
|                 | Sterne 34F <sub>2</sub>                                            | $\Delta$ sodA1    | Sterne 34F <sub>2</sub>                              | $\Delta$ sodA1    |
| 0               | 2.266 $\pm$ 0.350 <sup>b</sup>                                     | 1.431 $\pm$ 0.092 | 16.561 $\pm$ 2.345                                   | 4.092 $\pm$ 0.769 |
| 3               | 1.189 $\pm$ 0.105                                                  | 0.243 $\pm$ 0.001 | 0.149 $\pm$ 0.004                                    | 0.043 $\pm$ 0.049 |
| 6               | 0.203 $\pm$ 0.110                                                  | 0.224 $\pm$ 0.010 | 0.097 $\pm$ 0.001                                    | 0.008 $\pm$ 0.001 |
| 10              | 0.072 $\pm$ 0.003                                                  | 0.008 $\pm$ 0.001 | 0.017 $\pm$ 0.003                                    | 0.004 $\pm$ 0.001 |
| 20              | 0.039 $\pm$ 0.001                                                  | 0.004 $\pm$ 0.001 | 0.004 $\pm$ 0.001                                    | 0.003 $\pm$ 0.001 |

<sup>a</sup>Concentration of bacillibactin is expressed as  $\mu$ g/ml of supernatant from IDM cultures of *B. anthracis*.

<sup>b</sup>Quantification was performed three times from the independent extraction and values represent means  $\pm$  standard deviations.

doi:10.1371/journal.pone.0020777.t004

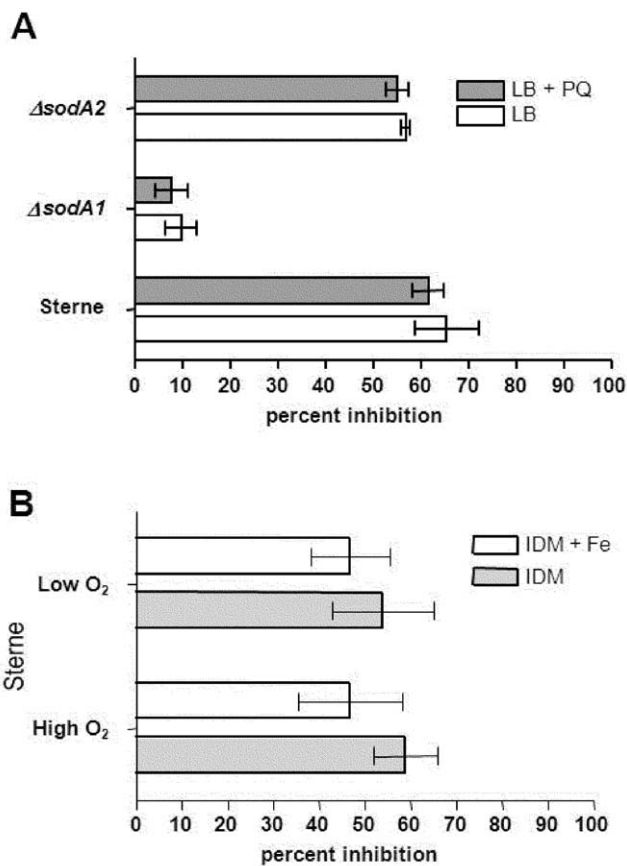

**Figure 5. Nitroblue tetrazolium salt (NBT) assay of superoxide dismutase (SOD) activity from whole cell lysates of *B. anthracis* grown in various growth conditions.** (A) Percent inhibition of superoxide production from 5  $\mu$ g of whole cell lysates of *B. anthracis* Sterne 34F<sub>2</sub> and the mutants  $\Delta$ sodA1 and  $\Delta$ sodA2 grown in LB (iron-rich) medium with and without the addition of a high concentration of paraquat (800  $\mu$ M). (B) Percent inhibition of superoxide production from 5  $\mu$ g of whole cell lysates of *B. anthracis* Sterne 34F<sub>2</sub> grown in IDM and IDM supplemented with 20  $\mu$ M Fe(II)SO<sub>4</sub>·7H<sub>2</sub>O under high and low aeration. Low O<sub>2</sub> indicates cultures grown in a 40% culture to flask volume/volume ratio with slow shaking (125 rpm); High O<sub>2</sub> indicates cultures grown in a 10% culture to flask volume/volume ratio with rigorous shaking (300 rpm). Percent inhibition indicates the amount by which the cell lysate inhibits NBT reduction relative to a non-lysate containing control reaction (see Materials and Methods). doi:10.1371/journal.pone.0020777.g005

of two early pathway genes in the *asb* and *bac* operons (*asbB* and *dhbC*, respectively). First, mRNA for the *asbB* gene was detected during growth in rich (LB), iron-poor (-Fe: IDM alone), and iron-supplemented (+Fe: IDM +20  $\mu$ M Fe(II)SO<sub>4</sub>) conditions. The *dhbC* gene, however, was only detected in cells grown in IDM with no iron supplementation (both aeration conditions). The abrogation of transcription of *dhbC* in the presence of iron suggests that bacillibactin biosynthesis is tightly regulated by iron concentration at the transcriptional level.

Closer inspection of the quantitative differences in gene expression for *asbB* revealed variant expression patterns for this gene between iron-depleted (-Fe) and iron-supplemented (+Fe) conditions. In both high ( $\uparrow$  O<sub>2</sub>) and low aeration ( $\downarrow$  O<sub>2</sub>), the *asbB* gene was more highly expressed when iron was limited (11-fold and 37-fold higher expression, respectively). In addition, comparing the amount of *asbB* expression between cells grown in rich medium versus in IDM (-Fe) with  $\uparrow$  O<sub>2</sub>, *asbB* transcript is about 21-fold less abundant in the rich medium. Finally, the amount of *asbB* expression in IDM with iron added under high and low aeration is equivalent. Collectively, these data suggest that although the highest transcription of *asbB* occurs under iron-limitation, transcription is not effectively shut down when iron is present, as is the case for *dhbC*. The presence of oxygen appears to support more active transcription of *asbB* than when aeration is low, but in effect, this gene transcript was detectable in all conditions tested. These transcriptional data mirror the results of petrobactin and bacillibactin metabolite accumulation described here, where higher levels of petrobactin are isolated during high aeration, but accumulation of this metabolite is not abolished by iron supplementation as found with bacillibactin. Other transcriptome studies have shown that the *asb* operon, in its entirety, is detected under multiple growth conditions [31,32], where the lowest levels of transcription occurred in the sporulation phase. These data suggest that the bacillibactin locus is highly regulated by the presence of iron, whereas the petrobactin locus is only mildly affected at the transcriptional level by cellular iron concentrations, and is more constitutive in nature. The *B. anthracis* genome contains several genes for multiple Fur-like regulatory proteins, and future work will focus on the biochemical roles that these proteins play in the regulation of these two siderophore operons.

*B. anthracis* utilizes secreted hemophores to scavenge heme from host hemoglobin, thereby facilitating iron acquisition from extracellular heme pools and delivering it to iron-regulated surface determinant (Isd) proteins [33,34]. A recent transcriptome study [35] showed that the iron acquisition system related to these proteins is important for virulence of *B. anthracis*. Although heme is

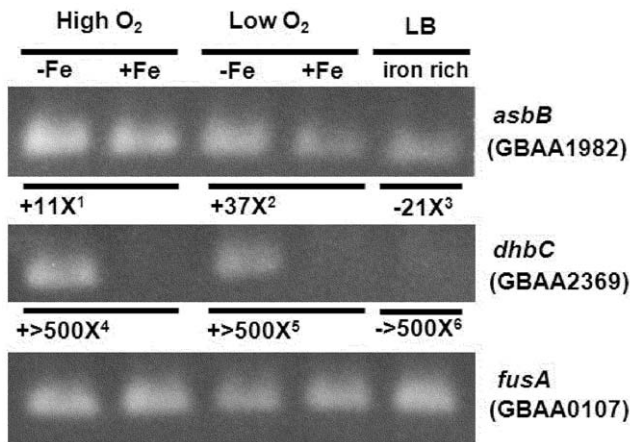

**Figure 6. End-Point RT-PCR and SYBR-Green qRT-PCR of select genes from the *asb* and *bac* operons in iron-depleted, iron-supplemented, and iron-rich conditions.** Ethidium bromide stained agarose gels from endpoint RT-PCR of the second gene in the *asb* operon (*asbB*), the second gene in the *bac* operon (*dhbC*) and a constitutively expressed elongation factor (*fusA*) from *B. anthracis* Sterne 34F<sub>2</sub> grown in different media with various iron concentrations. -Fe is Iron-Depleted Medium (IDM); +Fe is IDM with 20 μM Fe(II)SO<sub>4</sub> supplementation; LB is Luria Bertani Broth (~7.6 μM iron concentration). High O<sub>2</sub> and low O<sub>2</sub> are cultures grown in high or low aeration respectively. LB cultures were grown under high O<sub>2</sub> conditions (see Methods). Numbers are approximations of fold differences in transcript abundance as assayed by SYBR-Green qRT-PCR representing the following comparisons: <sup>1</sup>*asbB* is ~11-fold more highly expressed in IDM with high aeration than in IDM+Fe with high aeration. <sup>2</sup>*asbB* is ~37 fold more highly expressed in IDM with low aeration than in IDM+Fe with low aeration. <sup>3</sup>*asbB* is ~21 fold less abundant in LB medium than in IDM with high aeration. Note that there is less than a 2-fold difference in transcript abundance between LB and IDM+Fe. <sup>4</sup>*dhbC* is greater than 500 fold more highly expressed in IDM with high aeration than in IDM+Fe with high aeration. <sup>5</sup>*dhbC* is greater than 500 fold more highly expressed in IDM with low aeration than in IDM+Fe with low aeration. <sup>6</sup>*dhbC* is more than 500 fold less abundant in LB medium than in IDM with high aeration. Note that the abundance of transcript in LB medium as compared to IDM+Fe is approximately the same.  
doi:10.1371/journal.pone.0020777.g006

toxic to all bacterial pathogens [36], *B. anthracis* can grow on a high concentration of heme relative to other bacilli [37], and regulates its resistance to heme toxicity during infection through the HssRS two-component system [38]. Therefore, investigating the regulation of the *B. anthracis asb* and *bac* siderophore operons when heme is used as an iron source will also be an important avenue for future work.

In summary, we have demonstrated that the biosynthesis of petrobactin and bacillibactin in *B. anthracis* is subject to repression by increasing iron concentration, but that petrobactin biosynthesis is less affected by this level of regulation than bacillibactin. Whereas the transcription and biosynthesis of bacillibactin is effectively abrogated in the presence of even low levels of iron, petrobactin accumulation occurs in medium containing up to 20 μM iron, and transcription of the petrobactin biosynthetic operon can be detected even in iron-rich conditions. In addition, the presence of oxygen appears to support more active transcription of the *asb* operon and results in higher levels of end-point petrobactin accumulation. Conversely, the highest concentration of bacillibactin isolated so far was observed in iron-depleted conditions under low oxygen tension. Hence, the differences between petrobactin and bacillibactin regulation suggest that *B. anthracis* has evolved multiple strategies for metal acquisition.

## Materials and Methods

### Siderophores

Authentic siderophore standards were obtained as iron-free compounds. The catecholate siderophores petrobactin and bacillibactin were isolated from culture supernatants of the *B. anthracis* strain Sterne 34F<sub>2</sub> in Iron Depleted Medium (IDM) [11] as described previously [12,15]. Petrobactin and bacillibactin were dissolved in water and methanol, respectively, as stock solutions in this study.

### Bacterial Strains

Bacterial strains used for this study are summarized in Table 5. All *B. anthracis* strains were derived from the wild type strain Sterne 34F<sub>2</sub> [39], and were propagated at 37°C in LB or LB + kanamycin (40 μg/ml) as necessary.

### Bacterial Growth Conditions for Isolation of Petrobactin and Bacillibactin in IDM with Iron and Paraquat Stress and High and Low Aeration

For IDM cultures under iron variation: starter cultures of *B. anthracis* Sterne 34F<sub>2</sub> and mutants *ΔsodA1*, *ΔdhbACEBF*, and *ΔasbABCDEFG* were grown overnight in Brain-Heart Infusion (BHI) medium at 37°C with shaking at 300 rpm. Cells were spun down by centrifugation and washed three times in IDM. Cells were back-diluted into IDM to an OD<sub>600</sub> of 0.10 into IDM with 0, 3, 6, 10, and 20 μM FeSO<sub>4</sub> • 7H<sub>2</sub>O. Cultures of the strains *ΔdhbACEBF* and *ΔasbABCDEFG* were grown only with two concentrations of 0 and 20 μM FeSO<sub>4</sub> • 7H<sub>2</sub>O as controls. Cultures were shaken at 300 rpm at 37°C for 24 hours and then filtered in 0.02 μM pore-size Corning filter flasks. For IDM cultures with paraquat treatment: starter cultures of *B. anthracis* Sterne 34F<sub>2</sub> and *ΔsodA1* were grown as described above. Cultures were shaken at 300 rpm at 37°C for 24 hours with 0, 5, 15, 25 and 50 μM paraquat and filtered as described above. For high and low aeration cultures with varying iron: approximately 10<sup>9</sup> spores of *B. anthracis* Sterne 34F<sub>2</sub> or *ΔsodA1* were added to 50 ml of IDM with 0, 3, 6, 10 and 20 μM FeSO<sub>4</sub> • 7H<sub>2</sub>O. High aeration cultures were shaken at 300 rpm in plastic baffled 500 ml volume flasks (10% v/v ratio). Low aeration cultures were shaken at 110 rpm in plastic 125 ml volume flasks (40% v/v ratio). Cells were incubated for 24 hours at 37°C, and a final OD<sub>600</sub> was taken. Cultures were then filtrated as stated above. All filtrated supernatants were used for siderophore analysis.

### Bacterial Growth Conditions for RNA Isolation

RNA was collected from *B. anthracis* Sterne 34F<sub>2</sub> grown in IDM with either 0 (-Fe) or 20 (+Fe) μM FeSO<sub>4</sub> • 7H<sub>2</sub>O added to the

**Table 5. Bacterial strains used in this study.**

| Strain                    | Relevant characteristics                           | Reference |
|---------------------------|----------------------------------------------------|-----------|
| <i>Bacillus anthracis</i> |                                                    |           |
| Sterne 34F <sub>2</sub>   | Wild type (pXO1 <sup>+</sup> , pXO2 <sup>-</sup> ) | 35        |
| KDC3                      | 34F <sub>2</sub> , <i>ΔsodA1::Km<sup>r</sup></i>   | 14        |
| KDC5                      | 34F <sub>2</sub> , <i>ΔsodA2</i>                   | 14        |
| KDC7                      | 34F <sub>2</sub> , <i>ΔdhbACEBF</i>                | 15        |
| BA850                     | 34F <sub>2</sub> , <i>ΔasbABCDEFG</i>              | 12        |

doi:10.1371/journal.pone.0020777.t005



medium. Cells grown in “rich” medium were grown in LB broth. Starter cultures were grown overnight, and back-diluted 1:20. Cells were harvested by centrifugation when they reached OD<sub>600</sub> ~0.4–0.6 (mid log phase) for RNA collection. High aeration cells were grown 10% v/v in plastic baffled 500 ml flasks (50 ml) at 37°C and shaken at 300 rpm. At the target OD<sub>600</sub>, 10 ml of cells were harvested and pelleted by centrifugation at 4000 rpm at 5°C for 10 minutes. Low aeration cells were grown in a 40% v/v plastic 125 ml flask (50 ml) at 37°C and shaken at 110 rpm. RNA was collected using the Ambion Ribopure Bacteria Kit with modifications [15]. RNA preparations were cleaned up using the Qiagen RNEasy Cleanup Protocol with an on-column DNase digestion. RNA concentration was calculated using the A<sub>260/280</sub> method on a Beckman Spectrophotometer, and RNA integrity was checked on the Agilent Bioanalyzer system.

### Quantification of Siderophore Petrobactin and Bacillibactin

For quantification of petrobactin: Filtrated supernatants (10 ml) from IDM cultures were adjusted to pH 7.0. Two grams of Amberlite® XAD-16 resin (Supelco, PA) was added into the supernatant and the mixtures were shaken for one hour at 150 rpm in the dark. Mixtures were then filtered, and resin washed with pure water three times and eluted with 10 ml of methanol. Methanol eluates were concentrated to dryness *in vacuo* and dissolved in 100 µl of 50% methanol for quantification. For quantification of bacillibactin: IDM cultures (10 ml) were adjusted to pH 2.0 and then extracted with equal volumes of ethyl acetate three times. The organic layers were pooled and the solvents were concentrated into dryness *in vacuo*. The dried pellets were dissolved in 100 µl of methanol and used for quantitative analysis of bacillibactin.

The XAD-16 resin- or organic solvent extracts from the culture supernatants of *B. anthracis* were analyzed for quantification of petrobactin and bacillibactin, respectively, using a Shimadzu LCMS-2010EV system. (Detailed description on LCMS analysis can be found below). The 3,4-dihydroxybenzoic acid (for petrobactin) and 2,3-dihydroxybenzoic acid (for bacillibactin) were utilized as internal standards for signal normalization. 10 µl of a 3,4-dihydroxybenzoic acid or 2,3-dihydroxybenzoic acid stock solution (1 mM each) was added to the 100 µl of each sample. With the LC methods applied below, petrobactin and 3,4-dihydroxybenzoic acid showed retention times of 15.989–16.289 and 18.133 min and bacillibactin and 2,3-dihydroxybenzoic acid showed retention times of 19.204–19.300 and 17.367 min, respectively. The calibration curves were constructed by using a series of ten concentrations (ranging from 10 to 500 µM) of authentic petrobactin and bacillibactin for quantification. The retention time and mass spectrum of the corresponding petrobactin or bacillibactin peaks in each sample were compared with those of authentic petrobactin and bacillibactin standards. The petrobactin and bacillibactin quantities were calculated in µg/ml culture supernatant. Quantifications were performed three times from the independent extraction, and the mean values and standard deviations were calculated from the total data set.

### LCMS Analysis

LC was performed on a Shimadzu LC-20AD HPLC system consisting of a UV/VIS detector (SDP-20AV) and an autosampler (SIL-20AC). The HPLC was coupled to a Shimadzu LCMS-2010EV mass spectrometer with an electrospray ionization (ESI) interface. LC was carried out on an analytical column (Waters XBridge® C<sub>18</sub>, 3.5 µm, 2.1 × 150 mm) using a linear stepwise gradient from 5% to 50% aqueous acetonitrile in 0.1% (v/v)

formic acid (FA) at a flow rate of 0.1 ml/min over 30 minutes for petrobactin analysis. The solvent systems with a gradient from 10% to 100% aqueous acetonitrile in 0.1% (v/v) FA over 30 minutes were used for bacillibactin analysis under the same LC conditions as described above. The ESI source was set at the positive mode. Selected ion monitoring (SIM) was conducted to monitor ions at *m/z* 719.3, 883.2, and 155.2, which corresponded to the protonated molecular ions of petrobactin, bacillibactin, and internal standards 3,4-dihydroxybenzoic acid and 2,3-dihydroxybenzoic acid, respectively. The MS operating conditions were optimized as drying gas 1.5 l/min, CDL temperature 250°C, heat block temperature 200°C, and detector voltage 1.5 kV.

### SYBR-Green Quantitative RT-PCR

The gene *fusA*, which encodes a constitutively transcribed elongation factor (elongation factor G), was used as a standard for normalization of transcript from each of two experiments. The 700 ng of the RNA preps were used to make cDNA using 300 ng of random primers and Invitrogen SuperScript II Reverse Transcriptase, following the maker’s protocol with an overnight incubation at 42°C. For all samples, a no RT control was performed. Diagnostic PCR of the cDNA was done using 1.5 µl of each cDNA prep to eliminate the possibility of genomic DNA contamination (all negative), and for the confirmation of DNA synthesis using primers for the *fusA* gene. SYBR green PCR was performed on an ABI Prism 7900 HT at the University of Michigan cDNA Affymetrix Core at the Comprehensive Cancer Center. Applied Biosystems SYBR Green Master Mix was used with 1.5 µl of the cDNA preparations. Each reaction was performed 2 times and each primer set was run with (i) cDNA, (ii) the cDNA made with no RT control, and (iii) with no cDNA. The 40 elongation cycles were performed with 30-second elongation times and an annealing temperature of 55°C (optimized beforehand), with 94°C melting temperature and 68°C extension temperature. Primers used were for an internal segment of the second gene in the *bac* operon (*dhbC*, GBAA2369), an internal segment of the second gene in the *asb* operon (*asbB*, GBAA1982), and internal segments of the *sodA1* and *sodA2* genes (all PCR products were between 180 and 200 base pairs) (Table 6). Threshold (C<sub>T</sub>) values are the values where the PCR enters exponential amplification. C<sub>T</sub> values used were the mean of the results of 4 reactions (2 replicates per 2 biological replicates). Approximate transcript abundance was analyzed using the Comparative C<sub>T</sub> Method (or 2<sup>−[delta][delta]C<sub>T</sub></sup> Method). The *fusA* control product C<sub>T</sub> value is subtracted from each of the experimental C<sub>T</sub> values. The difference in transcript abundance is then calculated as 2<sup>−(difference in normalized C<sub>T</sub>s)</sup>.

### End-Point RT-PCR

700 ng of RNA collected as stated above was used to perform endpoint RT-PCR using Invitrogen one-step RT-PCR with Platinum *Taq* according to the manufacturer’s instructions. Briefly, RT was performed at 50°C for 30 minutes. PCR was performed with 0.25 pg of operon/gene-specific primers for 30 cycles with an elongation temperature of 70°C and an extension time of 30 seconds. 5 µl of endpoint PCR product was run on 0.7% agarose gels and visualized by ethidium bromide staining. Negative controls omitting reverse transcriptase and positive controls with *B. anthracis* Sterne 34F<sub>2</sub> genomic DNA were done with each experiment. PCR products were designed to result in ~200 base pair products.

### SOD Enzymatic Assays from Bacterial Cell Lysates

SOD enzymatic activity from whole cell lysates of *B. anthracis* Sterne 34F<sub>2</sub> and *ΔsodA1* was measured by the Nitroblue

**Table 6.** Oligonucleotide primers used in this study.

| Gene name and number <sup>a</sup> | Nucleotide sequence (5'-3' direction) |
|-----------------------------------|---------------------------------------|
| <i>dhbC</i> (GBAA2369)            | TCTTCGAGAATTAGCAGAGCA                 |
|                                   | TCCTCCGCTCTCTTTATCT                   |
| <i>asbB</i> (GBAA1982)            | TCGAGCGTAATGTATGATACGAA               |
|                                   | TCGTAGCCAATTCTCTATCCCAT               |
| <i>fusA</i> (GBAA0107)            | AGGTCACGTAGATTCACAGT                  |
|                                   | GAGTATAAGAAATCTGCACCG                 |
| <i>sodA1</i> (GBAA4499)           | TAAGATTGTCCAGAAGAATGT                 |
|                                   | CATACAAAACACCATAACACG                 |
| <i>odA2</i> (GBAA5696)            | CCTAATGGAGACGTTGCAAAA                 |
|                                   | GCAAAGGTGTATCTTGATTCG                 |

<sup>a</sup>GBAA numbers are from the Ames Ancestor genome contained in the TIGR Comprehensive Microbial Resource (<http://cmr.tigr.org/tigr-scripts/CMR/CmrHomePage.cgi>).

doi:10.1371/journal.pone.0020777.t006

Tetrazolium Salt (NBT) assay, modified from Oberly and Spitz [40]. Lysates were collected as follows: *B. anthracis* Sterne 34F<sub>2</sub> cultures were grown in LB medium with or without 1 hour treatment with 800 μM paraquat, or in IDM with high and low aeration (with and without 20 μM FeSO<sub>4</sub> • 7H<sub>2</sub>O supplementation) as described above. At mid-exponential phase (or after treatment with paraquat), cells were pelleted by centrifugation at 4°C, washed two times in ice cold PBS, and resuspended in 500 μl of 0.05M potassium phosphate buffer (pH 7.8) with 20 mM benzamidine. Cells were lysed via bead-beating with acid washed glass beads (diameter, 150–200 μm; Sigma G1145) for 8 1-minute cycles set on

homogenize with resting on ice for at least 2 minutes between pulses (Biospec mini-bead beater). Tubes were spun at 1,000 rpm at 4°C for 10 minutes. Supernatants were transferred to fresh tubes and spun at 4°C for 10 minutes at 5,000 rpm. Supernatants were transferred to fresh tubes and spun at 4°C at 14,000 rpm for 45 minutes and final supernatants were transferred to fresh tubes. Total protein was quantified with the Qubit Quant-iT Protein Assay (Invitrogen/MolecularProbes). Modified NBT assay is as follows: 800 μl of SOD reaction buffer (1 mM diethylenetriaminepentaacetic acid (DETAPAC, Sigma D6518) in 0.05 M potassium phosphate buffer (pH 7.8); 1 unit of catalase (Sigma C8531); 5.6 × 10<sup>-5</sup> M NBT (Sigma N5514); 10<sup>-4</sup> M xanthine (Sigma X0626)) and 200 μl of 0.05 M potassium phosphate buffer were added to a 1ml plastic cuvette and the solution was blanked on a Beckman DU530 spectrophotometer. Then, ~60 mU of xanthine oxidase (from bovine milk, Sigma X4500) suspended in 0.05 M potassium phosphate buffer (pH 7.8) was added to the cuvette, and absorbance at 560 nm (A<sub>560</sub>) was read every 30 seconds for 3.5 minutes. The rate of increase of absorbance was recorded and used as the control rate (optimized to be between 0.20 and 0.25 A/min). Next, whole cell lysates in a 200 μl volume with 1, 3, 5, or 10 μg of protein were added to 800 μl SOD reaction buffer and blanked. A ~60 mU of xanthine oxidase was added and the increase of A<sub>560</sub> was measured as with the control. Percent inhibition was calculated as: % inhibition = [(control rate – sample rate) / control rate] × 100. At least 3, and not more than 6, biological replicates were assayed, and final figures are the mean of the biological replicates with standard deviations.

### Author Contributions

Conceived and designed the experiments: JYL KDP PCH DHS. Performed the experiments: JYL KDP. Analyzed the data: JYL KDP PCH DHS. Contributed reagents/materials/analysis tools: JYL KDP PCH DHS. Wrote the paper: JYL KDP PCH DHS.

### References

- Köster W (2001) ABC transporter-mediated uptake of iron, siderophores, heme and vitamin B12. *Res Microbiol* 152: 291–301.
- Braun V (2001) Iron uptake mechanisms and their regulation in pathogenic bacteria. *Int J Med Microbiol* 291: 67–79.
- Bullen JJ, Rogers HJ, Spalding PB, Ward, CG (2006) Natural resistance, iron and infection: a challenge for clinical medicine. *J Med Microbiol* 55: 251–258.
- Weinberg ED (1978) Iron and infection. *Microbiol Rev* 42: 45–66.
- Beyer WF, Imlay J, Fridovich I (1991) Superoxide dismutases. *Prog Nucl Acids Res Mol Biol* 40: 221–253.
- Ratledge C, Dover LG (2000) Iron metabolism in pathogenic bacteria. *Annu Rev Microbiol* 54: 881–941.
- Carliz A, Touati D (1986) Isolation of superoxide dismutase mutants in *E. coli*: is superoxide dismutase necessary for aerobic life? *EMBO J* 5: 623–630.
- Fridovich I (1986) Superoxide dismutases. *Adv Enzymol* 58: 61–97.
- Dixon TC, Meselson M, Guillemin J, Hanna PC (1999) Anthrax. *New Engl J Med* 341: 815–826.
- Inglesby TV, O'Toole T, Henderson DA, Bartlett JG, Ascher MS, et al. (2002) Anthrax as a biological weapon, 2002, Updated Recommendations for Management. *JAMA* 287: 2236–2252.
- Cendrowski S, MacArthur W, Hanna PC (2004) *Bacillus anthracis* requires siderophore biosynthesis for growth in macrophages and mouse virulence. *Mol Microbiol* 51: 407–417.
- Lee JY, Janes BK, Passalacqua KD, Pflieger BF, Bergman NH, et al. (2007) Biosynthetic analysis of the petrobactin siderophore pathway from *Bacillus anthracis*. *J Bacteriol* 189: 1698–1710.
- Pflieger BF, Lee JY, Somu RV, Aldrich CC, Hanna PC, et al. (2007) Characterization and analysis of early enzymes for petrobactin biosynthesis in *Bacillus anthracis*. *Biochemistry* 46: 4147–4157.
- Passalacqua KD, Bergman NH, Herring-Palmer A, Hanna PC (2006) The superoxide dismutases of *Bacillus anthracis* do not cooperatively protect against endogenous superoxide stress. *J Bacteriol* 188: 3837–3848.
- Passalacqua KD, Bergman NH, Lee JY, Sherman DH, Hanna PC (2007) The global transcriptional responses of *Bacillus anthracis* Sterne (34F<sub>2</sub>) and a *AsodA1* mutant to paraquat reveal metal ion homeostasis imbalances during endogenous superoxide stress. *J Bacteriol* 189: 3996–4013.
- Budde AD, Leong SA (1989) Characterization of siderophores from *Ustilago maydis*. *Mycopathologia* 108: 125–133.
- Tindale AE, Mehrotra M, Ottem D, Page WJ (2000) Dual regulation of catecholate siderophore biosynthesis in *Azotobacter vinelandii* by iron and oxidative stress. *Microbiology* 146: 1617–1626.
- Wiebe MG (2002) Siderophore production by *Fusarium venenatum* A3/5. *Biochem Soc Trans* 30: 696–697.
- Atkin CL, Neilands JB, Phaff HJ (1970) Rhodotorulic acid from species of *Leucosporidium*, *Rhodospiridium*, *Rhodotorula*, *Sporidiobolus*, and *Sporobolomyces*, and a new alanine-containing ferrichrome from *Cryptococcus melibiosum*. *J Bacteriol* 103: 722–733.
- Drechsel H, Tschierske M, Thicken A, Jung G, Zähler H, et al. (1995) The carboxylate type siderophore rhizoferrin and its analogs produced by directed fermentation. *J Ind Microbiol* 14: 105–112.
- Brown SM, Howell ML, Vasil ML, Anderson AJ, Hassett DJ (1995) Cloning and characterization of the *katB* gene of *Pseudomonas aeruginosa* encoding a hydrogen peroxide-inducible catalase: purification of KatB, cellular localization, and demonstration that it is essential for optimal resistance to hydrogen peroxide. *J Bacteriol* 177: 6536–6544.
- Hassett DJ, Woodruff WA, Wozniak DJ, Vasil ML, Cohen MS, et al. (1993) Cloning and characterization of the *Pseudomonas aeruginosa* *sodA* and *sodB* genes encoding manganese- and iron-cofactored superoxide dismutase: demonstration of increased manganese superoxide dismutase activity in alginate-producing bacteria. *J Bacteriol* 175: 7658–7665.
- Dao KT, Hamer KE, Clark CL, Harshman LG (1999) Pyoverdine production by *Pseudomonas aeruginosa* exposed to metals or an oxidative stress agent. *Ecol Appl* 9: 441–448.
- Eisendle M, Schrettel M, Kragl C, Müller D, Illmer P, et al. (2006) The intracellular siderophore ferricrocin is involved in iron storage, oxidative-stress resistance, germination, and sexual development in *Aspergillus nidulans*. *Euk Cell* 5: 1596–1603.
- Koppisch AT, Browder CC, Moe AL, Shelley JT, Kinkel BA, et al. (2005) Petrobactin is the primary siderophore synthesized by *Bacillus anthracis* str. Sterne under conditions of iron starvation. *Biometals* 18: 577–585.
- Ollinger J, Song KB, Antelmann H, Hecker M, Hellmann JD (2006) Role of the Fur regulon in iron transport in *Bacillus subtilis*. *J Bacteriol* 188: 3664–3673.

27. Niederhoffer EC, Naranjo CM, Bradley KL, Fec JA (1990) Control of *Escherichia coli* superoxide dismutase (*sodA* and *sodB*) genes by the ferric uptake regulation (*fur*) locus. *J Bacteriol* 172: 1930–1938.
28. Tardat B, Touati D (1991) Two global regulators repress the anaerobic expression of MnSOD in *Escherichia coli*: Fur (ferric uptake regulation) and Arc (aerobic respiration control). *Mol Microbiol* 5: 455–465.
29. Tardat B, Touati D (1993) Iron and oxygen regulation of *Escherichia coli* MnSOD expression: competition between the global regulators Fur and ArcA for binding to DNA. *Mol Microbiol* 9: 53–63.
30. Read TD, Peterson SN, Tourasse N, Baillie LW, Paulsen IT, et al. (2003) The genome sequence of *Bacillus anthracis* Ames and comparison to closely related bacteria. *Nature* 423: 81–86.
31. Passalacqua KD, Varadarajan A, Ondov BD, Okou DT, Zwick ME, et al. (2009) Structure and complexity of a bacterial transcriptome. *J Bacteriol* 191: 3203–3211.
32. Bergman NH, Anderson EC, Swenson EE, Niemeyer MM, Miyoshi AD, et al. (2006) Transcriptional profiling of the *Bacillus anthracis* life cycle in vitro and an implied model for regulation of spore formation. *J Bacteriol* 188: 6092–6100.
33. Maresso AW, Garufi G, Schneewind O (2008) *Bacillus anthracis* secretes proteins that mediate heme acquisition from hemoglobin. *PLoS Pathog* 4: e1000132.
34. Tarlovsky Y, Fabian M, Solomaha E, Honsa E, Olson JS, et al. (2010) A *Bacillus anthracis* S-layer homology protein that binds heme and mediates heme delivery to IsdC. *J Bacteriol* 192: 3503–3511.
35. Carlson PE Jr., Carr KA, Janes BK, Anderson EC, Hanna PC (2009) Transcriptional profiling of *Bacillus anthracis* Sterne (34F2) during iron starvation. *PLoS One* 4: e6988.
36. Anzaldi LL, Skaar EP (2010) Overcoming the heme paradox: heme toxicity and tolerance in bacterial pathogens. *Infect Immun* 78: 4977–4989.
37. Van Heyningen WE (1948) Inhibition of aerobic sporing bacilli by haematin. *Nature* 162: 114–115.
38. Stauff DL, Skaar EP (2009) *Bacillus anthracis* HssRS signalling to HrtAB regulates haem resistance during infection. *Mol Microbiol* 72: 763–778.
39. Sterne M (1939) The immunization of laboratory animals against anthrax. *Onderstepoort J Vet Sci Anim Indust* 13: 313–317.
40. Oberley LW, Spitz DR (1984) Assay of superoxide dismutase activity in tumor tissue. *Methods Enzymol* 105: 457–464.
